# Supplementary material for: Identification of XylR, the Activator of Arabinose/Xylose Inducible Regulon in Sulfolobus acidocaldarius and Its Application for Homologous Protein Expression
Source: Front Microbiol. 2020 May 26;11:1066. doi: 10.3389/fmicb.2020.01066 (PMC7264815; doi:10.3389/fmicb.2020.01066)
Supplement: Supplementary file 2 [file Data_Sheet_2.xlsx]

## Sheet: final tableS2 xylR paper
	Table S2 plasmids used and constructed in this study
	plasmid	description	backbone	used primer	pcr template	used restriction enzymes	reference
	reference plasmids
	pSVA407	Backbone for in frame deletion					[21]
	pSVA431	Backbone for in frame deletion					[21]
	pSVA1551	Overexpression in Sulfolobus					[28]
	pSVAmZ-SH10	Overexpression in Sulfolobus					[25]
	pSVAaraFX system
	pSVAmS	lacS incl. Stop codon	pSVAmZ-SH10	1905, 5924	pCmalLacS	NcoI, BamHI	This study
	pSVA1583	Saci_2122 "ara" promoter	pSVAmS	5974, 6835	DSM639 gDNA	SacII, NcoI	This study
	pSVA1595	two step SapI sites deletion by overlap pcrs and restriction	pSVA1583	5941-5981, 5982-5983, 5984-5942	pSVAmZ-SH10	NotI, XmaI	This study
	pSVAaraFX-SH10	modified FX cloning cassette	pSVA1595	5985, 5986	pSVAmZ-SH10	NcoI, XhoI	This study
	pSVAaraFX-Stop	no tag	pSVAaraFX-SH10	7907, 7908	direct annealing	ApaI, XhoI	This study
	pSVAaraFX-S	C-terminal Strep-tag II	pSVAaraFX-SH10	7906, 5926	direct annealing	ApaI, XhoI	This study
	pSVAaraFX-H6	C-terminal 6xHis-tag	pSVAaraFX-SH10	7905, 5927	direct annealing	ApaI, XhoI	This study
	pSVAaraFX-HA	C-terminal HA-tag	pSVAaraFX-SH10	7903, 7904	direct annealing	ApaI, XhoI	This study
	pSVAaraFX-NtH10S	N-terminal 10xHis-tag + Strep-tag II	pSVAaraFX-Stop	5974, 7912	pSVAaraFX-SH10	SacII, NcoI	This study
	pSVAaraFX-NtS	N-terminal Strep-tag II	pSVAaraFX-Stop	5974, 7910	pSVAaraFX-SH10	SacII, NcoI	This study
	pSVAaraFX-NtH6	N-terminal 6xHis-tag	pSVAaraFX-Stop	5974, 7909	pSVAaraFX-SH10	SacII, NcoI	This study
	pSVAaraFX-NtHA	N-terminal HA-tag	pSVAaraFX-Stop	5974, 7911	pSVAaraFX-SH10	SacII, NcoI	This study
	pSVAmalFX and pSVAxylFX system
	pSVAmalFX-H6	Saci_1165 promoter	pSVAaraFX-H6	5970, 1973	DSM639 gDNA	SacII, NcoI	This study
	pSVAmalFX-HA	Saci_1165 promoter	pSVAaraFX-HA	5970, 1973	DSM639 gDNA	SacII, NcoI	This study
	pSVAmalFX-NtH10S	Saci_1165 promoter	pSVAaraFX-Stop	5970, 7920	DSM639 gDNA	SacII, NcoI	This study
	pSVAmalFX-NtH6	Saci_1165 promoter	pSVAaraFX-Stop	5970, 7917	DSM639 gDNA	SacII, NcoI	This study
	pSVAmalFX-NtHA	Saci_1165 promoter	pSVAaraFX-Stop	5970, 7919	DSM639 gDNA	SacII, NcoI	This study
	pSVAmalFX-NtS	Saci_1165 promoter	pSVAaraFX-Stop	5970, 7918	DSM639 gDNA	SacII, NcoI	This study
	pSVAmalFX-S	Saci_1165 promoter	pSVAaraFX-S	5970, 1973	DSM639 gDNA	SacII, NcoI	This study
	pSVAmalFX-SH10	Saci_1165 promoter	pSVAaraFX-SH10	5970, 1973	DSM639 gDNA	SacII, NcoI	This study
	pSVAmalFX-Stop	Saci_1165 promoter	pSVAaraFX-Stop	5970, 1973	DSM639 gDNA	SacII, NcoI	This study
	pSVAxylFX-H6	Saci_1938 promoter	pSVAaraFX-H6	7924, 6831	DSM639 gDNA	SacII, NcoI	This study
	pSVAxylFX-HA	Saci_1938 promoter	pSVAaraFX-HA	7924, 6831	DSM639 gDNA	SacII, NcoI	This study
	pSVAxylFX-NtH10S	Saci_1938 promoter	pSVAaraFX-Stop	7924, 7916	DSM639 gDNA	SacII, NcoI	This study
	pSVAxylFX-NtH6	Saci_1938 promoter	pSVAaraFX-Stop	7924, 7913	DSM639 gDNA	SacII, NcoI	This study
	pSVAxylFX-NtHA	Saci_1938 promoter	pSVAaraFX-Stop	7924, 7915	DSM639 gDNA	SacII, NcoI	This study
	pSVAxylFX-NtS	Saci_1938 promoter	pSVAaraFX-Stop	7924, 7914	DSM639 gDNA	SacII, NcoI	This study
	pSVAxylFX-S	Saci_1938 promoter	pSVAaraFX-S	7924, 6831	DSM639 gDNA	SacII, NcoI	This study
	pSVAxylFX-SH10	Saci_1938 promoter	pSVAaraFX-SH10	7924, 6831	DSM639 gDNA	SacII, NcoI	This study
	pSVAxylFX-Stop	Saci_1938 promoter	pSVAaraFX-Stop	7924, 6831	DSM639 gDNA	SacII, NcoI	This study
	pSVAaraFX system extension
	pSVAaraFX-empty	3 frame stop codons replace lacZ	pSVAaraFX-H6	1905, A82	pSVAaraFX-H6	SacII, ApaI	This study
	pBSaraFX-NtSS	N-terminal Twin-Strep-tag®	pSVAaraFX-Stop	1905, A73	pSVAaraFX-NtS	ApaI, XhoI	This study
	pBSaraFX-CtSS	C-terminal Twin-Strep-tag®	pSVAaraFX-Stop	A71, A72	direct annealing	ApaI, XhoI	This study
	additional plasmids
	pSVA595	KO plasmid Δsaci_2116 cloned by overlap pcr and restrictions	pSVA431	6849, 6850, 6851, 6852, 6853, 6854	DSM639 gDNA	NcoI, KpnI BamHI, PstI	This study
	pSVAaraLacS*	Expression lacS with Para	pSVA1551	1905, 5924 6834, 6835	pCmalLacS, DSM639 gDNA	NcoI, BamHI SacII, NcoI	This study
	pSVAaraFX-lacS-xylR	pSVAaraFX-lacS + xylR (saci_2116)	pSVAaraFX-lacS	7991, 7992	DSM639 gDNA	PstI, XmaI	This study
	pSVAaraBox1	Ara-box mutation bp7 T>C	pSVAaraFX-lacS-xylR	8946, 8947	-	round pcr	This study
	pSVAaraBox2	Ara-box mutation bp8 T>C	pSVAaraFX-lacS-xylR	8948, 8949	-	round pcr	This study
	pSVA-xylR	Expression saci_2116 with PxylR	pSVAaraFX-stop	9975, 9971	DSM639 gDNA	SacII, SalI	This study
	pSVA-S.isl-xylR	Expression m1627_2327 with PxylR cloned by overlap pcr and restriction	pSVAaraFX-stop	8990, 8991 8992, 8983	DSM639 gDNA, S.isl_M1627 gDNA	SacII, XhoI	This study
	pSVAmalFX-lacS	Expression plasmid lacS with PmalE	pSVAmalFX-stop	7925, 7926	pCmalLacS	SapI	This study
	pSVAxylFX-lacS	Expression plasmid lacS with Pxyl	pSVAxylFX-stop	7925, 7926	pCmalLacS	SapI	This study
	pSVAaraFX-lacS	Expression plasmids lacS with Para	pSVAaraFX-stop	7925, 7926	pCmalLacS	SapI	This study
	pBSaraFX-NtH10S-saci_1116	Expression saci_1116 with Para	pSVAaraFX-NtH10S	A15, A16	DSM639 gDNA	NcoI, XhoI	This study
	pBSaraFX-saci_1116-SH10	Expression saci_1116 with Para	pSVAaraFX-SH10	A15, A16	DSM639 gDNA	NcoI, XhoI	This study

## Sheet: final tableS3 xylR paper
		Table S3 Primers used in this study
		primer	description	sequence
		Expression system cloning
		1905	backbone fw	CGTATTACCGCCTTTGAGTG
		1973	saci_1165 rev incl. NcoI	AGTCCATGGTTAACTTAATCACGTAATTATTTATAAAC
		5924	LacS incl. Stop	ATAGGATCCGTCGACGCTAGCGACGTCTTAGTGCCTTAATGGCTTTAC
		5926	Strep-tag II	ATAGGGCCCTTACTTCTCAAATTGTGGATGACTCCACTCGAGCGA
		5927	6xHis-tag	ATAGGGCCCTTAATGGTGATGATGGTGATGCTCGAGCGAACCTCCTTGG
		5941	min pRN1 fw	ATTGCGGCCGCTTTCACACGGGTAATACTGAAAAATCTAC
		5942	min pRN1 rev	TATCCCGGGTTAGATAAATTCAAATTTTTGTTGTAAG
		5970	saci_1165 fw incl. SacII	TATCCGCGGCTAATTAATAATACTAATATCATTTC
		5974	ara109 fw	TATCCGCGGTATAAATACTAACTGCAATATTATATCTATAATTATTAC
		5981	SapI site 1 del	CTACAGAGCTCCTCTAACGCTGATTCTCCTATC
		5982	SapI site 1 del	GCGTTAGAGGAGCTCTGTAGAAAAACATTATG
		5983	SapI site 2 del	CGTGTTCTTCATCAATCCAGTGACAAATG
		5984	SapI site 2 del	CTGGATTGATGAAGAACACGTGCGGTTTGATTGAG
		5985	FX cassette	TAACCATGGCTAGTTGAAGAGCGCGCCCAATACGCAAACCG
		5986	FX cassette	ATACTCGAGTGCTGAAGAGCCGGATCCGTCGACGCTAGCG
		6831	saci_1938 rev incl. NcoI	GATCCATGGTACGTATTATCTTATCATTCTAATTTTTATC
		6835	ara rev	GATCCATGGTATGATAAGTAAGACGCTTATCAATTATTAG
		7903	HA-tag	GTTCGCTCGAGTACCCGTATGACGTTCCGGACTACGCGTAAGGGCCCACTTTCTCAAG
		7904	HA-tag	CTTGAGAAAGTGGGCCCTTACGCGTAGTCCGGAACGTCATACGGGTACTCGAGCGAAC
		7905	6xHis-tag	CCAAGGAGGTTCGCTCGAGCATCACCATCATCACCATTAAGGGCCCTAT
		7906	Strep-tag II	TCGCTCGAGTGGAGTCATCCACAATTTGAGAAGTAAGGGCCCTAT
		7907	stop codon	GATCCGGCTCTTCAGCACTCGAGTAAGGGCCCACTT
		7908	stop codon	AAGTGGGCCCTTACTCGAGTGCTGAAGAGCCGGATC
		7909	N-terminal 6xHis-tag	AGCCATGGCATGGTGATGATGGTGATGCGCCATGTTATGATAAGTAAGACGCTTATCAATTATTAG
		7910	N-terminal Strep-tag II	AGCCATGGCCTTCTCAAATTGTGGATGACTCCACGCCATGTTATGATAAGTAAGACGCTTATCAATTATTAG
		7911	N-terminal HA-tag	AGCCATGGCCGCGTAGTCCGGAACGTCATACGGGTACGCCATGTTATGATAAGTAAGACGCTTATCAATTATTAG
		7912	N-term H10S-tag	AGCCATGGCCTTCTCAAATTGTGGATGACTCCATCCGGAATGATGGTGATGATGGTGATGATGGTGATGCGCCATGTTATGATAAGTAAGACGCTTATCAATTATTAG
		7913	saci_1938 NtH6 rev incl. NcoI	AGCCATGGCATGGTGATGATGGTGATGTTTCATCATACGTATTATCTTATCATTCTAATTTTTATC
		7914	saci_1938 NtS rev incl. NcoI	AGCCATGGCCTTCTCAAATTGTGGATGACTCCATTTCATCATACGTATTATCTTATCATTCTAATTTTTATC
		7915	saci_1938 NtHA rev incl. NcoI	AGCCATGGCCGCGTAGTCCGGAACGTCATACGGGTATTTCATCATACGTATTATCTTATCATTCTAATTTTTATC
		7916	saci_1938 NtH10S rev incl. NcoI	AGCCATGGCCTTCTCAAATTGTGGATGACTCCATCCGGAATGATGGTGATGATGGTGATGATGGTGATGTTTCATCATACGTATTATCTTATCATTCTAATTTTTATC
		7917	saci_1165 NtH6 rev incl. NcoI	AGCCATGGCATGGTGATGATGGTGATGGTTCATGGTTAACTTAATCACGTAATTATTTATAAAC
		7918	saci_1165 NtS rev incl. NcoI	AGCCATGGCCTTCTCAAATTGTGGATGACTCCAGTTCATGGTTAACTTAATCACGTAATTATTTATAAAC
		7919	saci_1165 NtHA rev incl. NcoI	AGCCATGGCCGCGTAGTCCGGAACGTCATACGGGTAGTTCATGGTTAACTTAATCACGTAATTATTTATAAAC
		7920	saci_1165 NtH10S rev incl. NcoI	AGCCATGGCCTTCTCAAATTGTGGATGACTCCATCCGGAATGATGGTGATGATGGTGATGATGGTGATGGTTCATGGTTAACTTAATCACGTAATTATTTATAAAC
		7924	saci_1938 fw incl. SacII	TATCCGCGGTTATTGTAACCCTCTACTCGTGAC
		A71	C-term Twin-Strep-tag fw XhoI,ApaI	AATCTCGAGAGCGCTTGGTCACATCCTCAATTTGAGAAAGGTGGAGGTTCCGGAGGTGGATCGGGAGGTTCTGCATGGAGTCACCCACAGTTCGAAAAGTAAGGGCCCTAT
		A72	C-term Twin-Strep-tag rev XhoI,ApaI	ATAGGGCCCTTACTTTTCGAACTGTGGGTGACTCCATGCAGAACCTCCCGATCCACCTCCGGAACCTCCACCTTTCTCAAATTGAGGATGTGACCAAGCGCTCTCGAGATT
		A73	N-term Twin-Strep-tag rev NcoI	TAACCATGGAACCTCCCTTTTCGAATTGAGGATGTGACCATGCAGAACCTCCCGATCCACCTCCGGAACCTCCACCCTTCTCAAATTGTGGATGAC
		A82	3 frame stop ApaI	TAAGGGCCCTTATCTATTTAGGTATGATAAGTAAGACGCTTATC
		Knock out saci_2116
		6849	saci_2116 fw NcoI	GATCCATGGCATAAGGGTTGATAGGAATAAG
		6850	saci_2116 rev KpnI	GATGGTACCTCAGAATTTGTTAGAGTTGTC
		6851	saci_2116 US fw BamHI	GATGGATCCGAGGCGGATCTTCTATTATTC
		6852	saci_2116 US rev OL 6853	GAAAGAGAGTGTCACCGCATCCTCACCTTGTAAATTTGCATC
		6853	saci_2116 DS fw OL 6852	CAAGGTGAGGATGCGGTGACACTCTCTTTCACACTAAGTC
		6854	saci_2116 DS rev PstI	GATCTGCAGCAAGACAAGTGTGGACTTATG
		QPCR saci_2122
		1480	secY-housekeep-qRT-PCR-fw	CCTGCAACATCTATCCATAACATACCGA
		1481	secY-housekeep-qRT-PCR-rev	CCTCATAGTGTATATGCTTTAGTAGTAG
		6877	saci_2122-qRT-PCR-fw	TTGTCAATATAGTCCCGTCAGG
		6878	saci_2122-qRT-PCR-rev	CAGTGTGAACACGAACAAGATG
		ONPG assay xylR
		6834	Psaci_2122 fw SacII	GATCCGCGGCTCTTTTCATATAAAGATTGGAAGATTTC
		6835	Psaci_2122 rev NcoI	GATCCATGGTATGATAAGTAAGACGCTTATCAATTATTAG
		7991	Psaci_2116 fw PstI	ATACTGCAGAAGCATATTCTAGTGTAATAC
		7992	saci_2116 rev XmaI	TAACCCGGGTCAGAATTTGTTAGAGTTG
		Complementation assay xylR
		8983	m1627_2327 rev XhoI	CATCTCGAGTGCTTGAGAGTTTATAAATAACTGGCTCAAAATTTTC
		8990	Psaci_2116 fw SacII	CATCCGCGGGTAAAGCTAGGCTTAGGATATAATC
		8991	Psaci_2116 rev OL 8992	CTTTATAAACGTGCATCATAGTTGGTTTTATATAGGG
		8992	m1627_2327 fw OL 8991	CTATATAAAACCAACTATGATGCACGTTTATAAAGTCGAGCTTG
		9971	saci_2116 rev SalI	CATGTCGACGAATTTGTTAGAGTTGTCTACGAAAACTTG
		9975	Psaci_2116 fw SacII	CATCCGCGGGTAAAGCTAGGCTTAGGATATAATC
		ONPG assay expression plasmids
		6834	Psaci_2122 fw SacII	GATCCGCGGCTCTTTTCATATAAAGATTGGAAGATTTC
		6835	Psaci_2122 rev NcoI	GATCCATGGTATGATAAGTAAGACGCTTATCAATTATTAG
		7925	LacS FX fw SapI	ATATATGCTCTTCTAGTGACTCATTTCCAAATAGCTTTAG
		7926	LacS FX rev SapI	TATATAGCTCTTCATGCGTGTCTTAATGGCTTTACTGGAGGTAC
		7991	Psaci_2116 fw PstI	ATACTGCAGAAGCATATTCTAGTGTAATAC
		7992	saci_2116 rev XmaI	TAACCCGGGTCAGAATTTGTTAGAGTTG
		8946	araBox1 Fw AACATGCT	AACATGCTAAAATAAATACTAATAATTGATAAGCGTCTTA
		8947	araBox1 Rev AACATGCT	ATTTTAGCATGTTAAACGTTATAAACGCTGAGT
		8948	araBox2 Fw AACATGTC	AACATGTCAAAATAAATACTAATAATTGATAAGCGTCTTA
		8949	araBox2 Rev AACATGTC	TTATTTTGACATGTTAAACGTTATAAACGCTGAGT
		saci_1116 expression
		A15	saci_1116 fw NcoI	TAACCATGGCTCCTTTAGATCCAACCATAAAG
		A16	saci_1116 rev XhoI	TATCTCGAGAAAACTGTTGTAGAATACTCGTCTC
